# Supplementary material for: Nuclear Factor of Activated T Cells Is Activated in the Endothelium of Retinal Microvessels in Diabetic Mice
Source: PubMed Central journal article supplement (PMC4396720; doi:10.1155/2015/428473), 2015-03-31

## Online Supplemental Material

Table S1. Plasma cytokines

| Cytokine      | Control<br>(n=7) | STZ<br>(n=8) | Control+A-285222<br>(n=8) | STZ+A-285222<br>(n=8) |
|---------------|------------------|--------------|---------------------------|-----------------------|
| OPN           | 81.0±11.4        | 94.2±32.5    | 76.5±12.1                 | 84.9±20.7             |
| IL-10         | 13.8±8.4         | 15.8±10.4    | 14.4±4.2                  | 12.7±7.7              |
| TNF- $\alpha$ | n.d.             | 0.2±0.7      | 0.2±0.4                   | n.d.                  |
| IFN- $\gamma$ | 1.9±0.9          | 3.4±3.3      | 2.1±1.0                   | 1.0±0.6*              |
| IL-12p70      | 6.7±8.9          | 8.7±8.5      | 4.8±7.8                   | 16.6±27.6             |
| IL-1 $\beta$  | 0.6±0.3          | 1.1±0.8      | 0.8±0.2                   | 0.7±0.4               |
| IL-6          | 2.9±1.9          | 7.8±1.4      | 4.6±4.4                   | 3.3±3.9               |
| KC            | 39.0±5.6         | 60.6±41.5    | 68.2±17.1                 | 68.1±27.5             |

Cytokine levels are expressed in ng/ml for OPN and in pg/ml for all other cytokines. Values represent mean  $\pm$  SD. Plasma cytokine levels in control and STZ-treated BALB/c mice that have been treated with the NFAT inhibitor A-285222 (0.29 mg/kg for 2 weeks followed by 0.15 mg/kg for last 2 weeks) or saline, measured 4 weeks after the first STZ/vehicle injection. Interleukin (IL)-10, tumor necrosis factor (TNF)- $\alpha$ , interferon (IFN)- $\gamma$ , IL-12p70, IL-1 $\beta$ , IL-6 and keratinocyte chemoattractant (KC) were measured using multiplex technology. n.d.; not detectable. Two-way ANOVA revealed no significant interactions, except for IFN- $\gamma$ . For IFN- $\gamma$ , one-way ANOVA and Bonferroni post-test revealed \* $P < 0.05$  vs STZ-treated saline group.

**Supplementary figure 1.** Confocal immunofluorescence images showing staining of retinal whole-mounts with antibodies against von Willebrand factor (**A**; 1:400), smooth muscle  $\alpha$ -actin (**B**; 1:400) and platelet-derived growth factor  $\beta$ -receptor (**C**; PDGFR $\beta$ , 1:100) for

identification of endothelial, smooth muscle cells and pericytes, respectively. **D.** Smooth muscle  $\alpha$ -actin and PDGFR $\beta$  double staining of retinal whole-mounts.

**Supplementary Figure 2.** Representative confocal immunofluorescence images of retinal whole mounts, stimulated for 30 min in high extracellular glucose (HG; 20 mmol/l) in the presence of A-285222 (**A**; 1 $\mu$ mol), or apyrase (**B**; 3.6 U/ml), or after stimulation with low D-glucose (LG; 2 mmol/l) plus mannitol (**C**; 18 mmol/l), or LG plus L-glucose (**D**; 18 mmol/l). Preparations were stained for NFATc3 (red) and SYTOX Green for identification of nuclei (green). Endothelial cells were identified by the orientation of their nuclei. Scale bars=50  $\mu$ m.

**Supplementary Figure 3. No significant effects of high glucose on NFATc2 nuclear accumulation in endothelial cells.** **A.** Representative confocal immunofluorescence images of HUVEC stimulated for 30 min in low (LG; 2 mmol/l) or high (HG; 20 mmol/l; right panels) extracellular glucose with or without A-285222 (1 $\mu$ mol), stained for NFATc2 (red) and SYTOX Green for identification of nuclei (green). **B.** Summarized data from experiments as in (A), showing NFATc2 nuclear accumulation after 30 min stimulation in LG or HG in the presence or absence of A-285222 (1 $\mu$ mol), or after stimulation with LG plus mannitol (18 mmol/l). **C.** Summarized data from corresponding confocal experiments in HRMVECs, stimulated as in (A) and with VEGF (25 ng/ml) with or without A-285222 (1 $\mu$ mol).

**Supplementary Figure 4.** Expression of *OPN* mRNA in isolated retinal microvessels from normolipidemic (A-B) and dyslipidemic (C) diabetic mice, determined by quantitative RT-PCR. **A.** No differences between *OPN* mRNA expression levels in retinal vessels from diabetic and control NFAT-luc mice, measured 2 weeks after the first STZ/vehicle injection. *HPRT* was used as endogenous control. N=19 mice/group. **B.** No differences between *OPN*

mRNA expression in retinal vessels from Akita and WT littermate control mice. *18S* and *Cytophilin B* were used as endogenous controls. N=12 and 4 for WT and Akita, respectively.

**C.** *OPN* mRNA expression was significantly higher in diabetic *ApoE*<sup>-/-</sup> mice when compared to non-diabetic *ApoE*<sup>-/-</sup> mice measured 8 weeks after the first STZ/vehicle injection. *HPRT* and *GAPDH* were used as endogenous controls. N=11 mice/group, \**P*<0.05.

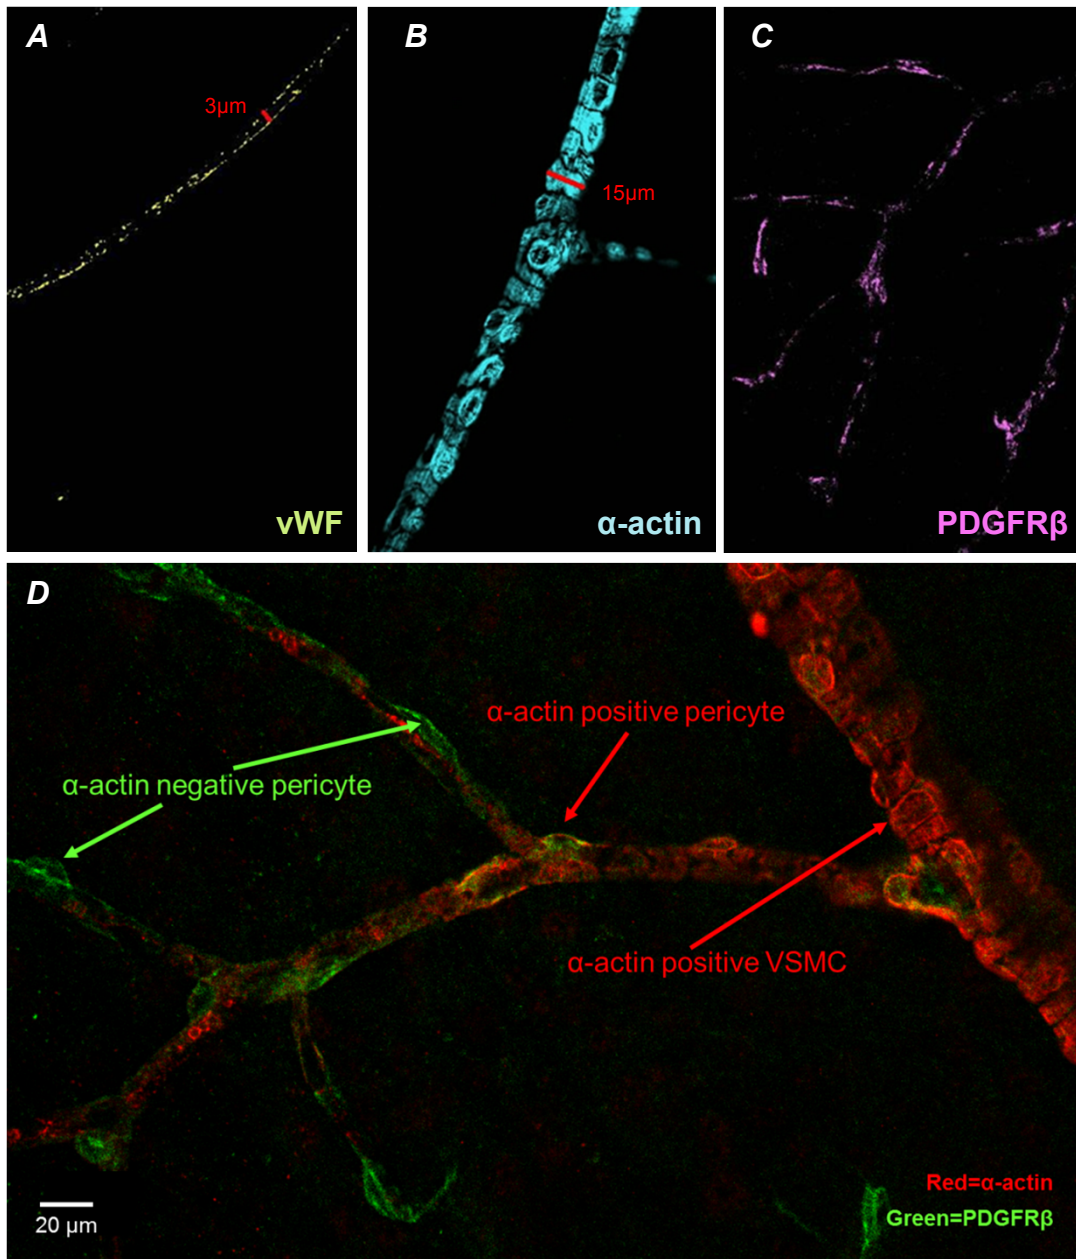

Supplemental figure 1

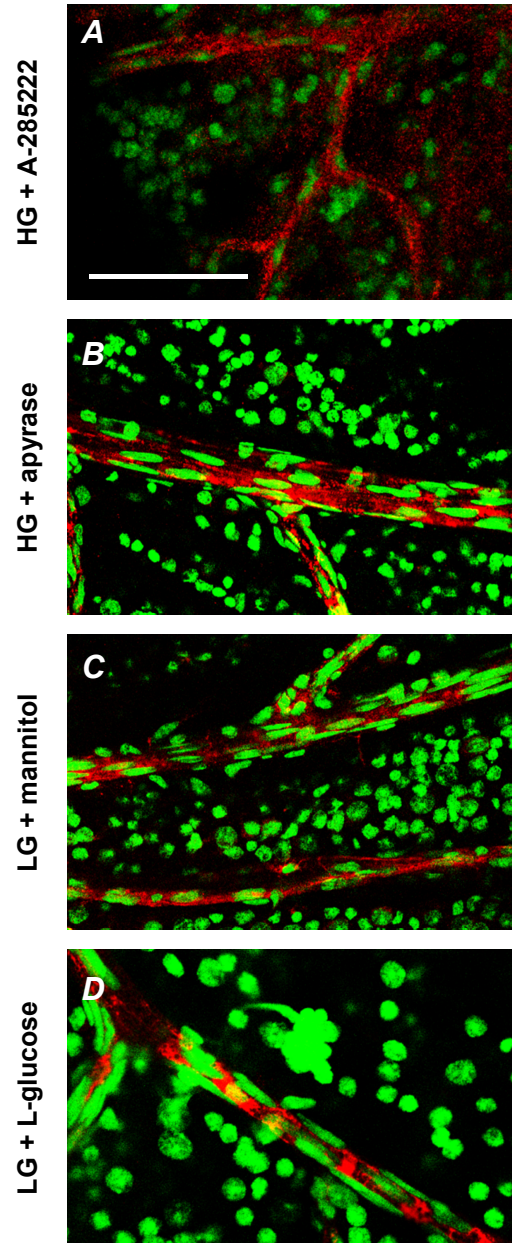

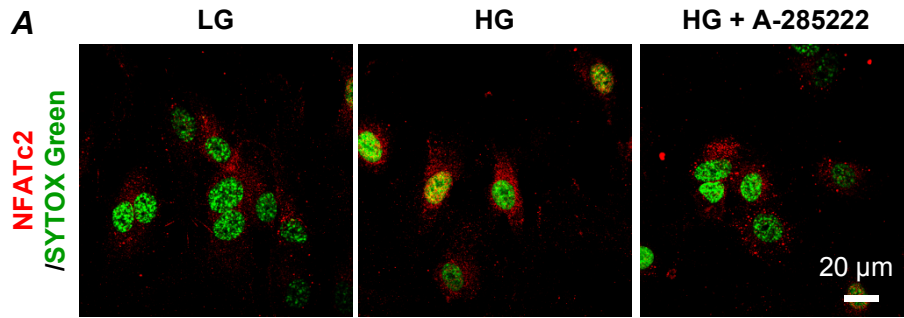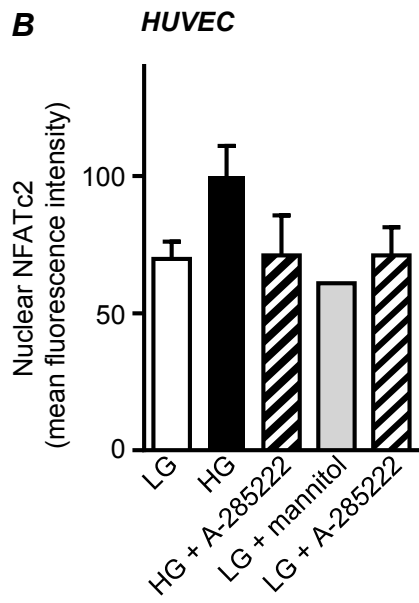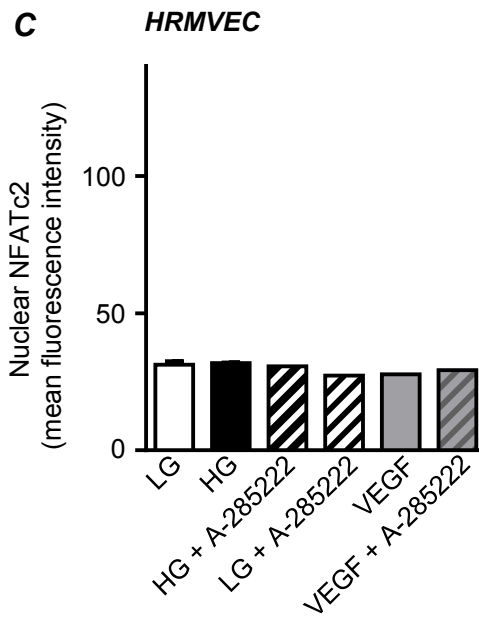

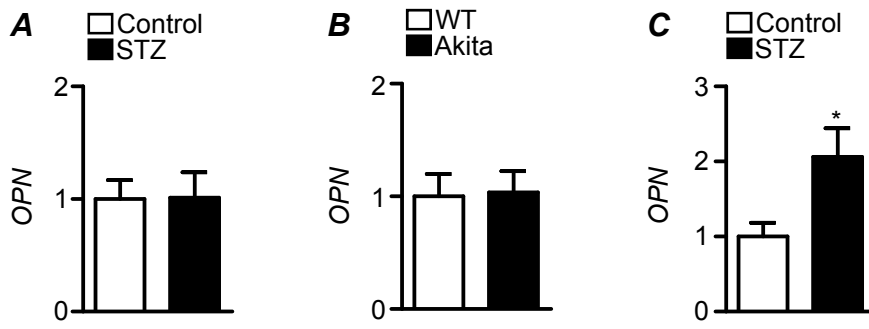

Supplement: 428473.f1.pdf [file 428473.f1.pdf]
